# Supplementary material
Source: PubMed Central journal article supplement (PMC2823889)
Supplement: 0914018107_pnas.200914018SI.pdf [file 0914018107_pnas.200914018SI.pdf]

# Supporting Information

Ericson et al. 10.1073/pnas.0914018107

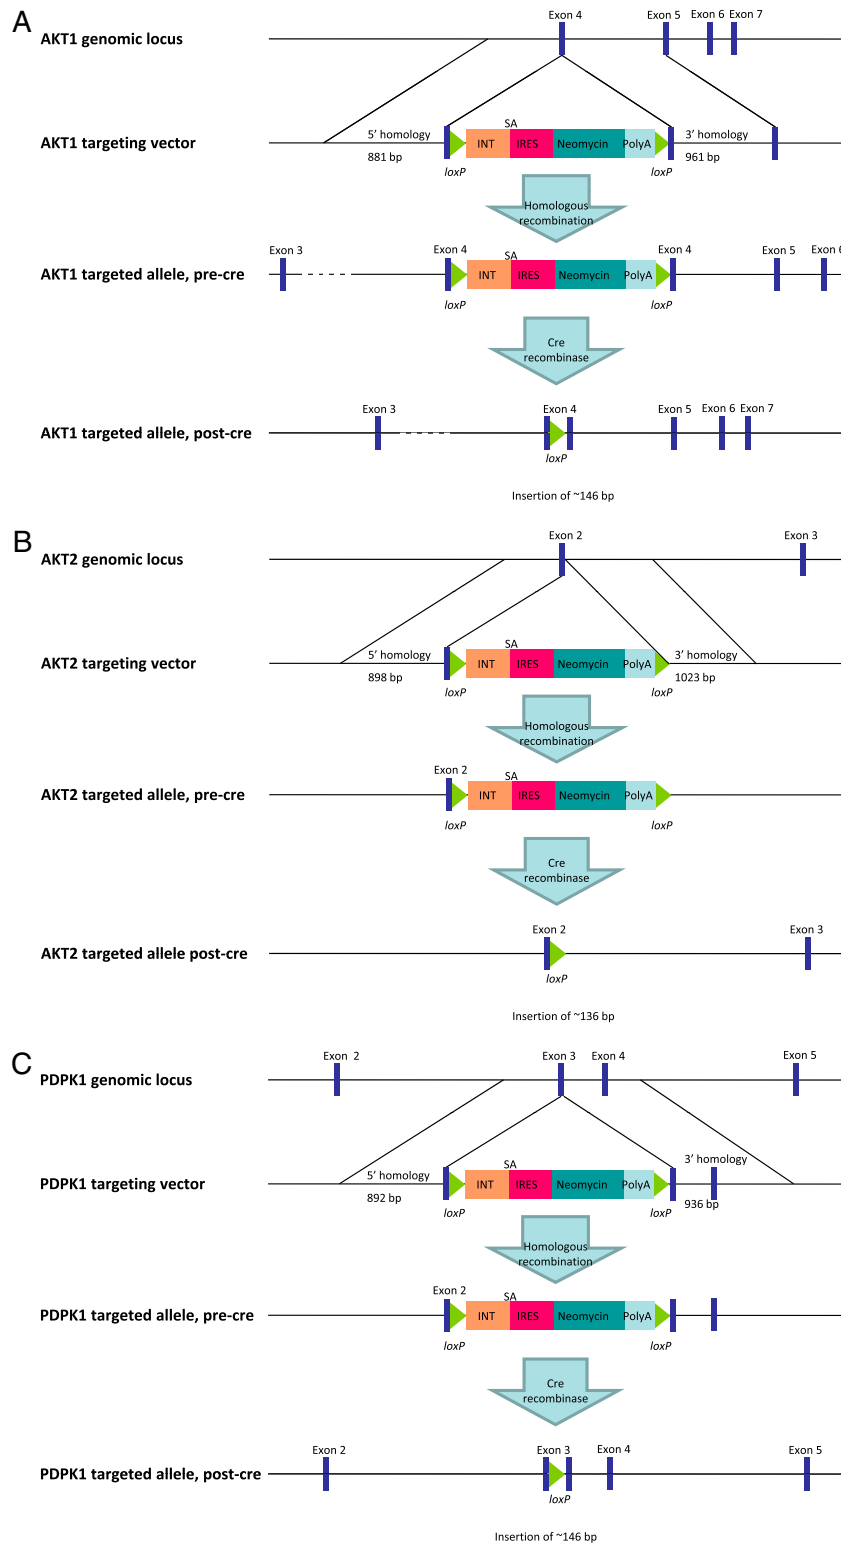

**Fig. S1.** Targeting strategy. The genetic loci for *AKT1*, *AKT2*, and *PDPK1* are shown along with the targeting constructs and the targeted allele before and after Cre-mediated excision of the vector sequences. INT, synthetic intron; SA, splice acceptor site; IRES, internal ribosomal entry site; Neomycin, neomycin resistance gene. (A) *AKT1* targeting vector. (B) *AKT2* targeting vector. (C) *PDPK1* targeting vector.

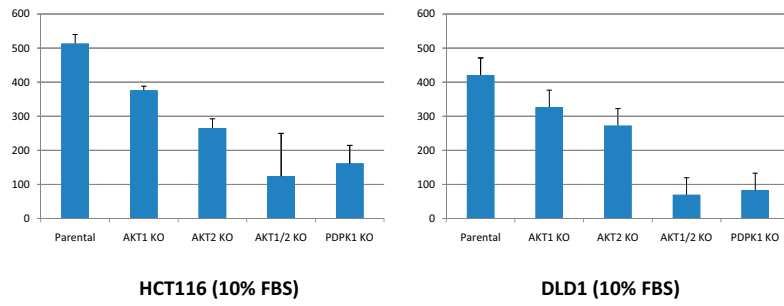

**Fig. S2.** Colony formation in normal growth media. Approximately 1,500 cells of the indicated cell lines were seeded in T25 flasks, cultured for 11–12 days in medium containing 10% FBS, and then stained and counted.

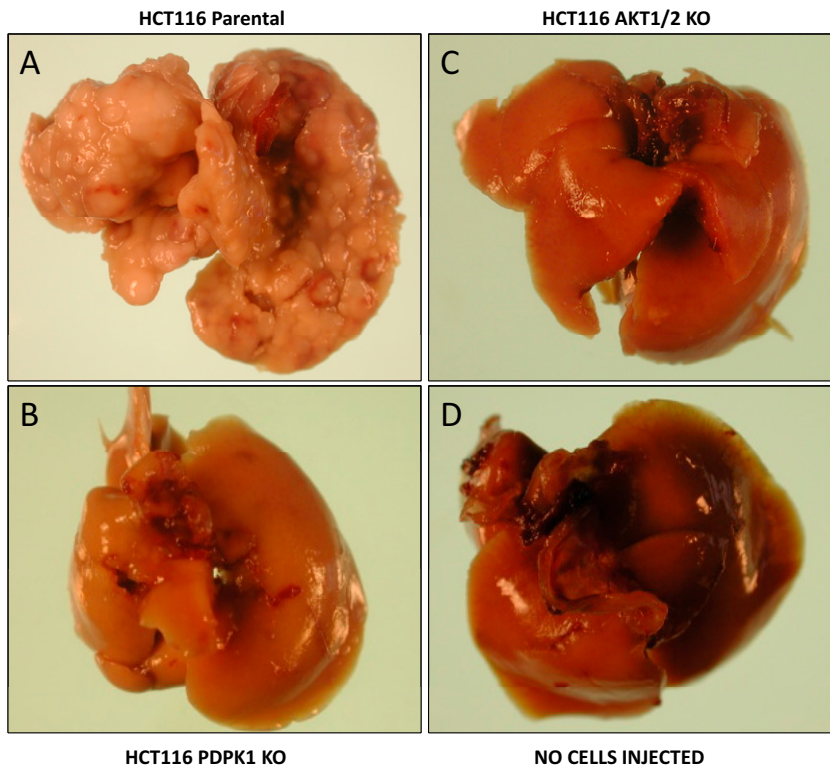

**Fig. S3.** Tumor foci visible on the liver surface 5 weeks after injection of the indicated cells.

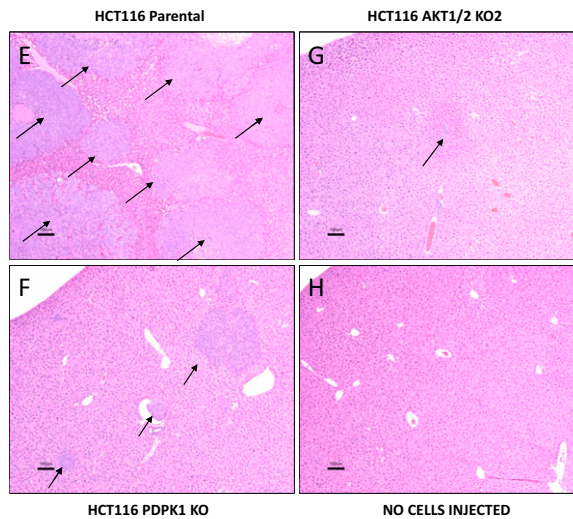

**Fig. S4.** H&E-stained sections of the livers shown in Fig. S3. The arrows indicate areas containing cancer cells.



**Table S1. Tumorigenicity following intrasplenic injection**

| Mouse ID | Cell type         | Lung                       |        | Liver              |         |             |        | Spleen        |        |               |        |
|----------|-------------------|----------------------------|--------|--------------------|---------|-------------|--------|---------------|--------|---------------|--------|
|          |                   | Histology (Number of foci) | Median | Visible on surface | Median* | Histology** | Median | Human DNA, pg | Median | Human DNA, pg | Median |
| H6-1     | HCT116            | 10                         | 1.5    | >200               | >200    | TNTC        | TNTC   | 14300         | 19800  | 22600         | 20000  |
| H6-2     | Parental          | 1                          |        | >200               |         | TNTC        |        | 20700         |        | 13500         |        |
| H6-3     |                   | N/D                        |        | >200               |         | TNTC        |        | 26800         |        | 18700         |        |
| H6-4     |                   | 2                          |        | >200               |         | TNTC        |        | 19800         |        | 20000         |        |
| H6-5     |                   | 1                          |        | >200               |         | TNTC        |        | 15600         |        | 23800         |        |
| F6-1     | HCT116            | 0                          | 0      | 0                  | 0       | 0           | 0      | 0.1           | 7.7    | 97.8          | 9800   |
| F6-2     | AKT1 /            | 0                          |        | 0                  |         | 0           |        | 1.5           |        | 9800          |        |
| F6-3     | AKT2 KO1          | 0                          |        | 0                  |         | 2           |        | 9.3           |        | 15745         |        |
| F6-4     |                   | 0                          |        | 0                  |         | 4           |        | 11.6          |        | 10600         |        |
| F6-5     |                   | 0                          |        | 0                  |         | 0           |        | 7.7           |        | 6520          |        |
| G6-1     | HCT116            | 0                          | 0      | 0                  | 0       | 0           | 0      | 0.3           | 0.3    | 166           | 166    |
| G6-2     | AKT1 /            | 0                          |        | 0                  |         | 0           |        | 8.4           |        | 1800          |        |
| G6-3     | AKT2 KO2          | 0                          |        | 0                  |         | 0           |        | 0.3           |        | 0.1           |        |
| G6-4     |                   | 0                          |        | 1                  |         | 0           |        | 0.1           |        | 1.2           |        |
| G6-5     |                   | 0                          |        | 0                  |         | 1           |        | 0.3           |        | 889           |        |
| B6-1     | HCT116            | 0                          | 0      | 3                  | 3       | 10          | 10     | 81.4          | 81.4   | 5240          | 5240   |
| B6-2     | PDPK1 KO1         | 0                          |        | 4                  |         | 22          |        | 565           |        | 6820          |        |
| B6-3     |                   | 0                          |        | 0                  |         | 8           |        | 40.0          |        | 6110          |        |
| B6-4     |                   | 0                          |        | 3                  |         | 19          |        | 183           |        | 5160          |        |
| B6-5     |                   | 0                          |        | 0                  |         | 4           |        | 1.9           |        | 4100          |        |
| C6-1     | HCT116            | 0                          | 1      | 1                  | 1       | 6           | 6      | 168           | 80.9   | 9250          | 6880   |
| C6-2     | PDPK1 KO2         | 2                          |        | 3                  |         | 9           |        | 2380          |        | 6880          |        |
| C6-3     |                   | 0                          |        | 0                  |         | 8           |        | 40.3          |        | 3940          |        |
| C6-4     |                   | 1                          |        | 2                  |         | 6           |        | 10.0          |        | 7870          |        |
| C6-5     |                   | 2                          |        | 0                  |         | 4           |        | 80.9          |        | 6330          |        |
| I6-1     | HCT116            | 7                          | 1.5    | 1                  | 33      | 9           | 41.5   | 20.3          | 5650   | 69.5          | 14400  |
| I6-2     | AKT1 KO1          | 3                          |        | 7                  |         | 10          |        | 71.4          |        | 2560          |        |
| I6-3     |                   | 0                          |        | 30                 |         | 66          |        | 5650          |        | 28800         |        |
| I6-4     |                   | 0                          |        | 43                 |         | 51          |        | 13400         |        | 10800         |        |
| I6-5     |                   | 0                          |        | 33                 |         | 32          |        | 7550          |        | 21400         |        |
| I6-6     |                   | 0                          |        | 55                 |         | 52          |        | 1830          |        | 11100         |        |
| I6-7     |                   | 11                         |        | 96                 |         | TNTC        |        | 16300         |        | 14400         |        |
| J6-1     | HCT116            | 0                          | 0      | 6                  | 3       | 21          | 6      | 3600          | 88.7   | 6680          | 14400  |
| J6-2     | AKT1 KO2          | 0                          |        | 0                  |         | 1           |        | 88.7          |        | 12900         |        |
| J6-3     |                   | 0                          |        | 3                  |         | 6           |        | 4.7           |        | 16000         |        |
| J6-4     |                   | 6                          |        | 22                 |         | 16          |        | 1200          |        | 14400         |        |
| J6-5     |                   | 0                          |        | 0                  |         | 6           |        | 82.0          |        | 18500         |        |
| D6-1     | HCT116            | 0                          | 0      | 74                 | 74      | 72          | 57     | 7320          | 1430   | 22900         | 10600  |
| D6-2     | AKT2 KO1          | 0                          |        | 81                 |         | 57          |        | 1270          |        | 11300         |        |
| D6-3     |                   | 0                          |        | 23                 |         | 20          |        | 21.5          |        | 10600         |        |
| D6-4     |                   | 0                          |        | 21                 |         | 12          |        | 1430          |        | 7830          |        |
| D6-5     |                   | 0                          |        | 94                 |         | 131         |        | 3160          |        | 10400         |        |
| E6-1     | HCT116            | 0                          | 0      | >200               | >200    | TNTC        | TNTC   | 5600          | 5600   | 9160          | 8770   |
| E6-2     | AKT2 KO2          | 0                          |        | >200               |         | TNTC        |        | 4910          |        | 8650          |        |
| E6-3     |                   | 0                          |        | 24                 |         | 21          |        | 548           |        | 8170          |        |
| E6-4     |                   | 1                          |        | >200               |         | TNTC        |        | 7720          |        | 8770          |        |
| E6-5     |                   | N/D                        |        | >200               |         | TNTC        |        | 10400         |        | 11300         |        |
| E7-1     | No cells injected | 0                          | 0      | 0                  | 0       | 0           | 0      | 0.1           | 0.1    | 0.1           | 0.0    |
| E7-2     |                   | 0                          |        | 0                  |         | 0           |        | 0.0           |        | 0.0           |        |
| A7-1     | DLD1              | 0                          | 0      | 0                  | 10      | 0           | 7      | 1.4           | 175    | 5 070         | 5 340  |
| A7-2     | Parental          | 0                          |        | 23                 |         | 13          |        | 198           |        | 4 290         |        |
| A7-3     |                   | 5                          |        | 27                 |         | 7           |        | 612           |        | 6 540         |        |
| A7-5     |                   | 0                          |        | 10                 |         | 7           |        | 175           |        | 9 230         |        |
| A7-6     |                   | 1                          |        | 0                  |         | 5           |        | 3.6           |        | 5 340         |        |
| N7-1     | DLD1 AKT1 /       | 0                          | 0      | 0                  | 0       | 0           | 0      | 1.0           | 2.0    | 4 670         | 4 940  |
| N7-2     | AKT2 KO1          | 0                          |        | 0                  |         | 0           |        | 3.8           |        | 4 940         |        |
| N7-3     |                   | 0                          |        | 0                  |         | 0           |        | 0.9           |        | 4 080         |        |
| N7-4     |                   | 0                          |        | 0                  |         | 0           |        | 2.0           |        | 6 000         |        |
| N7-5     |                   | 0                          |        | 0                  |         | 0           |        | 2.4           |        | 5 520         |        |

**Table S1. Cont.**

| Mouse ID | Cell type   | Lung                       |        | Liver              |         |             |        |               | Spleen |               |        |
|----------|-------------|----------------------------|--------|--------------------|---------|-------------|--------|---------------|--------|---------------|--------|
|          |             | Histology (Number of foci) | Median | Visible on surface | Median* | Histology** | Median | Human DNA, pg | Median | Human DNA, pg | Median |
| O7-1     | DLD1 AKT1 / | 0                          | 0      | 0                  | 0       | 0           | 0      | 1.1           | 0.3    | 3 327         | 642    |
| O7-2     | AKT2 KO2    | 0                          |        | 0                  |         | 0           |        | 0.1           |        | 50.7          |        |
| O7-3     |             | 0                          |        | 0                  |         | 0           |        | 0.4           |        | 807           |        |
| O7-4     |             | 0                          |        | 0                  |         | 0           |        | 0.3           |        | 642           |        |
| O7-5     |             | 0                          |        | 0                  |         | 0           |        | 0.1           |        | 419           |        |
| H7-1     | DLD1        | 0                          | 0      | 0                  | 0       | 0           | 0      | 0.1           | 0.2    | 2 020         | 2 020  |
| H7-2     | PDPK1 KO1   | 0                          |        | 1                  |         | 1           |        | 0.1           |        | 1 110         |        |
| H7-3     |             | 0                          |        | 0                  |         | 0           |        | 0.2           |        | 185           |        |
| H7-4     |             | 0                          |        | 0                  |         | 0           |        | 0.7           |        | 8 010         |        |
| H7-5     |             | 0                          |        | 1                  |         | 1           |        | 0.4           |        | 6 200         |        |
| I7-1     | DLD1        | 0                          | 0      | 0                  | 0       | 0           | 0      | 0.2           | 0.2    | 5 400         | 4 340  |
| I7-2     | PDPK1 KO2   | 0                          |        | 0                  |         | 0           |        | 0.2           |        | 4 020         |        |
| I7-3     |             | 0                          |        | 0                  |         | 0           |        | 0.1           |        | 6 300         |        |
| I7-4     |             | 0                          |        | 0                  |         | 0           |        | 0.2           |        | 4 340         |        |
| I7-5     |             | 0                          |        | 0                  |         | 0           |        | 0.1           |        | 1 620         |        |
| F7-1     | DLD1        | 0                          | 0      | 15                 | 18      | 8           | 7      | 195           | 40.6   | 5 320         | 5 320  |
| F7-2     | AKT1 KO1    | 1                          |        | 9                  |         | 4           |        | 0.5           |        | 4 710         |        |
| F7-3     |             | 0                          |        | 23                 |         | 7           |        | 600           |        | 2 680         |        |
| F7-4     |             | 0                          |        | 19                 |         | 16          |        | 0.6           |        | 6 050         |        |
| F7-5     |             | 3                          |        | 18                 |         | 6           |        | 40.6          |        | 5 680         |        |
| G7-1     | DLD1        | 0                          | 0      | 7                  | 7       | 1           | 7      | 19.6          | 14.3   | 11 200        | 9 030  |
| G7-2     | AKT1 KO2    | 0                          |        | 5                  |         | 7           |        | 14.3          |        | 8 310         |        |
| G7-3     |             | 3                          |        | 7                  |         | 3           |        | 0.5           |        | 9 030         |        |
| G7-4     |             | 0                          |        | 11                 |         | 9           |        | 251           |        | 9 560         |        |
| G7-5     |             | 0                          |        | 13                 |         | 12          |        | 6.8           |        | 5 630         |        |
| J7-1     | DLD1        | 0                          | 0      | 0                  | 0       | 0           | 1      | 0.5           | 0.4    | 7 340         | 5 840  |
| J7-2     | AKT2 KO1    | 0                          |        | 3                  |         | 1           |        | 0.2           |        | 2 740         |        |
| J7-4     |             | 0                          |        | 2                  |         | 2           |        | 0.2           |        | 6 360         |        |
| J7-5     |             | 0                          |        | 0                  |         | 1           |        | 0.5           |        | 6 010         |        |
| J7-7     |             | 0                          |        | 0                  |         | 1           |        | 1.0           |        | 4 530         |        |
| J7-8     |             | 0                          |        | 0                  |         | 0           |        | 0.3           |        | 5 680         |        |
| K7-1     | DLD1        | 0                          | 0      | 0                  | 4       | 0           | 0      | 1.6           | 2.4    | 7 550         | 7 220  |
| K7-2     | AKT2 KO2    | 0                          |        | 4                  |         | 3           |        | 2.7           |        | 7 150         |        |
| K7-3     |             | 0                          |        | 4                  |         | 0           |        | 4.3           |        | 5 130         |        |
| K7-4     |             | 0                          |        | 5                  |         | 0           |        | 2.0           |        | 7 220         |        |
| K7-5     |             | 0                          |        | 0                  |         | 1           |        | 2.4           |        | 7 360         |        |
| E7-1     | No cells    | 0                          | 0      | 0                  | 0       | 0           | 0      | 0.1           | 0.1    | 0.1           | 0.0    |
| E7-2     | injected    | 0                          |        | 0                  |         | 0           |        | 0.0           |        | 0.0           |        |

\*\*In the indicated specimens, there were at least 200 foci but the actual number was difficult to count because of adjoining lesions (see Fig. S3).

\* The number of foci present in a total of five sections, one from each of five lobes of the liver. TNTC: Too numerous to count.

**Table S2. Primers used in Fig. 1**

|                         |         |                       |
|-------------------------|---------|-----------------------|
| Wild-type PDPK1         | Forward | ACCACCAGCCAGCTGTATGAC |
|                         | Reverse | TCGCATATTCTCTGGAGGTTG |
| pSEPT inserted in PDPK1 | Forward | ACCACCAGCCAGCTGTATGAC |
|                         | Reverse | AAGCCTGCCACACCTCAAGC  |
| Wild-type AKT1          | Forward | AGGCTCCCCTCAACAACCTTC |
|                         | Reverse | CTCCTCCTCCTCTGCTTCT   |
| pSEPT inserted in AKT1  | Forward | CCTCGCAGACAGCGAATTA   |
|                         | Reverse | ATGGCACCTTCATTGGCTAC  |
| Wild-type AKT2          | Forward | GGTGCCTCCTGCATGTCC    |
|                         | Reverse | CCTCTCGGTCTTCATCAGC   |
| pSEPT inserted in AKT2  | Forward | GGTGCCTCCTGCATGTCC    |
|                         | Reverse | AAGCCTGCCACACCTCAAGC  |
